# Supplementary material for: Diagonal Paraspinal Sarcopenia and Osteoporosis contribute to the Rotatory Subluxation in patients with Degenerative Lumbar Scoliosis
Source: Research Square preprint supplement (doi:10.21203/rs.3.rs-6202643/v1), 2025-04-17
Supplement: Supplementary file 1 [file 1b0172eaba3459d21f1ce2e9.docx]

**Table.** Comparison of the PSM and HU asymmetry degree among Non-RS group, Single level RS group and double level RS group on each disc level.

| **Non-RS group** | | | **Single level RS group** | | | | | | | |  | | | | | | **Double level RS group** | | | | |
| --- | --- | --- | --- | --- | --- | --- | --- | --- | --- | --- | --- | --- | --- | --- | --- | --- | --- | --- | --- | --- | --- |
|  | | | **RSL2/3 level** | **RSL3/4 level** | | | | | **RSL4/5 level** | | |  | | | | **RSL2/3, L3/4 level** | | | **RSL3/4, L4/5 level** | | |
| **Ro CSA of ES (cm2)** | | | | | | | | | | | | | | | | | | | | | |
| L1/L2 disc level | 0.89 [0.82, 0.96] | 1.16 [0.93, 1.19] ***§** | | | 1.09 [0.86, 1.15] **#** | | 0.99 [0.82, 1.13] | | | | | | 0.92 [0.83,0.97] * | | | | | | 0.96 [0.82, 1.05] **§** | | |
| L2/L3 disc level | 0.86 [0.76, 0.96] | 0.79 [0.72, 0.93] | | | 1.03 [0.92, 1.28] | | 0.75 [0.63, 0.92] | | | | | | 0.90 [0.84, 0.96] | | | | | | 0.89 [0.76, 0.98] | | |
| L3/L4 disc level | 0.92 [0.86, 1.02] | 0.99 [0.81, 1.08] | | | 0.87 [0.63, 1.10] θ | | 0.93 [0.74, 1.08] ψ | | | | | | 1.02 [0.91, 1.23] | | | | | | 1.18 [0.97, 1.26] **#**θψ | | |
| L4/L5 disc level | 1.02 [0.93, 1.15] | 1.04 [0.93, 1.15] * | | | 1.05 [0.83, 1.09] Ω | | 1.20 [0.99, 1.28] **#**ψ | | | | | | 1.25 [1.07, 1.31] **#***Ω | | | | | | 0.95 [0.83, 1.13] ψ | | |
| L5/S1 disc level | 0.99 [0.90, 1.12] | 0.97 [0.87, 1.06] **§** | | | 1.15 [1.03, 1.21] | | 0.91 [0.79, 1.05] λ | | | | | | 1.12 [0.97, 1.25] λ | | | | | | 1.17 [1.04, 1.28] **#§** | | |
| **Ro CSA of MF (cm2)** | | | | | | | | | | | | | | | | | | | | | |
| L1/L2 disc level | 0.85 [0.80, 0.95] | 0.82 [0.78, 0.91] | | | | 0.72 [0.63, 0.92] **#**Ωθ | 0.91 [0.83, 1.08] | | | | | | | 0.92 [0.87, 1.15] Ω | | | | 0.93 [0.82, 1.36] θ | | | |
| L2/L3 disc level | 0.86 [0.81, 0.97] | 1.28 [0.83, 1.30] **#*****§** | | | | 0.79 [0.69, 0.83] | 0.93 [0.84, 1.10] | | | | | | | 0.83 [0.76, 1.08] * | | | | 0.81 [0.71, 0.95] **§** | | | |
| L3/L4 disc level | 0.96 [0.87, 1.12] | 1.16 [0.92, 1.21] **#§** | | | | 0.96 [0.82, 1.04] | 1.06 [0.74, 1.17] | | | | | | | 1.05 [0.93, 1.28] | | | | 0.94 [0.82, 1.17] **§** | | | |
| L4/L5 disc level | 1.03 [0.92, 1.17] | 1.03 [0.89, 1.15] | | | | 1.05 [0.91, 1.17] | 1.12 [0.83, 1.24] **#** | | | | | | | 1.16 [0.83,1.24] **#** | | | | 1.15 [1.03, 1.28] **#** | | | |
| L5/S1 disc level | 1.07 [0.95, 1.16] | 1.09 [0.92, 1.20] **§** | | | | 1.11 [0.97, 1.34] θ | 1.17 [1.05, 1.21] ψ | | | | | | | 1.03 [0.92, 1.17] | | | | 1.32 [1.09, 1.38] **#§**θψ | | | |
| **Ro FI of ES (%)** | | | | | | | | | | | | | | | | | | | | | |
| L1/L2 disc level | 0.79 [0.52, 1.17] | 0.81 [0.61, 0.89] | | | | 0.61 [0.52, 0.78] θ | 0.78 [0.68, 0.81] | | | | | | | | 0.74 [0.64,0.86] | | | 0.85 [0.78, 0.92] θ | | |
| L2/L3 disc level | 0.91 [0.72, 1.12] | 0.80 [0.66, 1.12] * | | | | 0.76 [0.68, 0.83] **#**Ω | 0.99 [0.77, 1.08] ψ | | | | | | | | 1.01 [0.86, 1.27] *Ω | | | 0.76 [0.63, 0.82] **#**ψ | | |
| L3/L4 disc level | 1.16 [0.81, 1.63] | 1.39 [1.27, 1.53]**#*****§** | | | | 1.26 [0.96,1.38] θ | 0.72 [0.65, 0.98] **#**λψ | | | | | | | | 1.11 [1.01, 1.34] *λ | | | 1.01 [0.92, 1.28] **§**θψ | | |
| L4/L5 disc level | 1.24 [1.06, 1.62] | 1.73 [1.43, 2.03]**#*****§** | | | | 1.75 [1.42, 1.93] **#**Ωθ | 1.02 [0.92,1.23] **#**ψ | | | | | | | | 0.92 [0.83, 0.96] **#***Ω | | | 1.39 [1.13, 1.46] **§**θψ | | |
| L5/S1 disc level | 1.14 [0.93, 1.28] | 1.60 [1.34, 2.00]**#*** | | | | 1.10 [1.07, 1.26] θ | 1.03 [0.81, 1.31] ψ | | | | | | | | 1.13 [1.05, 1.26] * | | | 1.58 [1.28, 1.71] **#**θψ | | |
| **Ro FI of MF (%)** | | | | | | | | | | | | | | | | | | | | | |
| L1/L2 disc level | 0.81 [0.56, 0.94] | 0.45 [0.41, 0.73] **#*****§** | | | | 0.47 [0.36, 0.63] **#**θ | | 0.48 [0.42, 0.53] **#**ψ | | | | | | | 0.65 [0.57, 0.73] **#*** | | | 0.78 [0.61, 0.87] **§**θψ | | | |
| L2/L3 disc level | 0.83 [0.64, 1.04] | 1.70 [1.34, 1.76] **#*****§** | | | | 0.58 [0.48, 0.72] **#** | | 0.40 [0.37, 0.48] **#**λψ | | | | | | | 0.80 [0.75, 0.88] *λ | | | 0.57 [0.52, 0.74] **#§**ψ | | | |
| L3/L4 disc level | 1.07 [0.60, 1.31] | 1.60 [1.26, 1.82] **#*****§** | | | | 1.32 [1.20, 1.57] **#**Ωθ | | 0.75 [0.63, 0.82] **#**λψ | | | | | | | 2.05 [1.67, 2.19] **#***Ωλ | | | 2.02 [1.72, 2.19] **#§**θψ | | | |
| L4/L5 disc level | 1.12 [0.88, 1.41] | 1.35 [1.17, 1.58] **#** | | | | 1.78 [1.46, 1.93] **#**Ωθ | | 1.18 [1.04, 1.27] | | | | | | | 1.22 [1.10, 1.46] **#**Ω | | | 1.31 [1.24, 1.49] **#**θ | | | |
| L5/S1 disc level | 1.00 [0.91, 1.25] | 1.38 [1.26, 1.63] **#*****§** | | | | 1.39 [1.04, 1.55] **#**Ωθ | | 1.70 [1.64, 1.85] **#**λψ | | | | | | | 1.08 [0.89, 1.24] *Ωλ | | | 1.14 [1.05, 1.21] **#§**θψ | | | |
| **Ro HU measurement** | | | | | | | | | | | | | | | | | | | | | |
| L1 level | 0.96 [0.86, 1.13] | 0.51 [0.43, 0.63] **#** | | | | 0.53 [0.42, 0.59] **#** | | | | 0.67 [0.61, 0.79] **#** | | | | | 0.58 [0.51, 0.73] **#** | | | | | 0.54 [0.50, 0.83] **#** | |
| L2 level | 0.87 [0.82, 0.96] | 0.79 [0.71, 0.85] **#*****§** | | | | 0.52 [0.38, 0.63] **#**Ωθ | | | | 0.57 [0.50, 0.76] **#**λ | | | | | 0.33 [0.29, 0.42] **#***Ωλ | | | | | 0.38 [0.34, 0.58] **#§**θ | |
| L3 level | 0.75 [0.63, 0.85] | 0.78 [0.68, 0.88] **§** | | | | 0.56 [0.45, 0.61] **#**θ | | | | 0.51 [0.46, 0.61] **#**ψ | | | | | 0.65 [0.53, 0.81] | | | | | 0.30 [0.28, 0.53] **#§**θψ | |
| L4 level | 0.86 [0.76, 0.98] | 1.19 [0.93, 1.24] **#§** | | | | 1.63 [1.42, 1.92] **#**Ωθ | | | | 0.65 [0.57, 0.76] **#**λ | | | | | 1.38 [1.18,1.46] **#**Ωλ | | | | | 0.67 [0.57, 0.74] **#§**θ | |
| L5 level | 0.93 [0.83, 1.03] | 2.03 [1.43, 2.16] **#*****§** | | | | 1.69 [1.57, 1.88] **#**Ωθ | | | | 1.36 [1.17, 1.42] **#** | | | | | 1.10 [0.92,1.18] **#***Ω | | | | | 1.40 [1.29, 1.53] **#§**θ | |

Ro FI%, the ratio of convex side FI% to concave side FI%. Ro CSA, the ratio of convex side CSA to concave side CSA. Ro HU, the ratio of convex side HU to concave side HU. **#**:compared to Non- RS group, P<0.05; *: RSL2/3 level vs RSL2/3, L3/4 level, P<0.05; **§**: RSL2/3 level vs RSL3/4, L4/5 level, P<0.05; Ω: RSL3/4 level vs RSL2/3, L3/4 level, P<0.05; θ: RSL3/4 level vs RSL3/4, L4/5 level, P<0.05; λ:RSL4/5 level vs RSL2/3, L3/4 level, P<0.05; ψ: RSL4/5 level vs RSL3/4, L4/5 level, P<0.05.

|  |
| --- |

| Parameters | Intra-rater coefficient | Inter-rater coefficient | |
| --- | --- | --- | --- |
| ***Radiological parameters*** | | | |
| CA (°) | 0.89 | | 0.92 |
| LT (mm) | 0.95 | | 0.94 |
| CBD (mm) | 0.91 | | 0.93 |
| LL (°) | 0.95 | | 0.90 |
| TK (°) | 0.84 | | 0.92 |
| SVA (mm) | 0.96 | | 0.94 |
|  | ***PSM and HU assessments*** | |  |
| CSA (cm2) | 0.93 | | 0.94 |
| FI% | 0.95 | | 0.87 |
| HU | 0.92 | | 0.89 |

Intra- and inter-rater reliability test for all parameters
